# Supplementary material for: Estimating vaccine effectiveness against SARS-CoV-2 infection, hospitalization and death from ecologic data in Costa Rica
Source: BMC Infect Dis. 2022 Oct 2;22:767. doi: 10.1186/s12879-022-07740-5 (PMC9526815; doi:10.1186/s12879-022-07740-5)
Supplement: Supplementary file 2 — Additional file 2. Other members of the RESPIRA Study Group [file 12879_2022_7740_MOESM2_ESM.docx]

**Additional File 2**

Members of the RESPIRA Study Group who did not contribute directly to this paper.

Caja Costarricense de Seguro Social: Arturo Abdelnour7, Alejandro Calderón7, Karla Moreno7, Melvin Morera7, Roy Wong7.
Ministerio de Salud, Costa Rica: Roberto Castro8.
Agencia Costarricense de Investigaciones Biomédicas – Fundación INCIENSA, Costa Rica: Bernal Cortés9, Viviana Loría9, Rebecca Ocampo9, Carolina Porras9, Michael Zúñiga9.
Fogarty International Center, National Institutes of Health: Kaiyuan Sun10.

7Caja Costarricense de Seguro Social, San José, Costa Rica.  8Ministerio de Salud, San José, Costa Rica. 9Agencia Costarricense de Investigaciones Biomédicas – Fundación INCIENSA, San José, Costa Rica. 10Fogarty International Center, National Institutes of Health, Bethesda, United States of America.
